# Supplementary material for: Comparison of inclusion properties between p-tert-butylcalix[4]arene and p-tert-butylthiacalix[4]arene towards primary alcohols in crystals
Source: Royal Society of Chemistry journal article supplement (doi:10.1039/c5ce00370a), 2015-01-01
Supplement: c5ce00370a1.pdf [file c5ce00370a1.pdf]

Comparison of inclusion properties between *p-tert*-butylcalix[4]arene and  
*p-tert*-butylthiacalix[4]arene towards primary alcohols in crystals

Naoya Morohashi,\* Kazuki Nanbu, Ayano Tonosaki, Shintaro Noji, Tetsutaro Hattori\*

*Department of Biomolecular Engineering, Graduate School of Engineering, Tohoku  
University, 6-6-11 Aramaki-Aoba, Aoba-ku, Sendai 980-8579, Japan*

### Supporting Information

Contents:

|      |                                                                                               |    |
|------|-----------------------------------------------------------------------------------------------|----|
| I.   | Powder X-ray diffraction (PXRD) studies                                                       | S2 |
| II.  | Single crystal X-ray diffraction (XRD) studies for<br>inclusion crystals of compound <b>1</b> | S4 |
| III. | Single crystal X-ray diffraction (XRD) studies for<br>inclusion crystals of compound <b>2</b> | S7 |
| IV.  | Reference                                                                                     | S9 |

## I. Powder X-ray diffraction (PXRD) studies

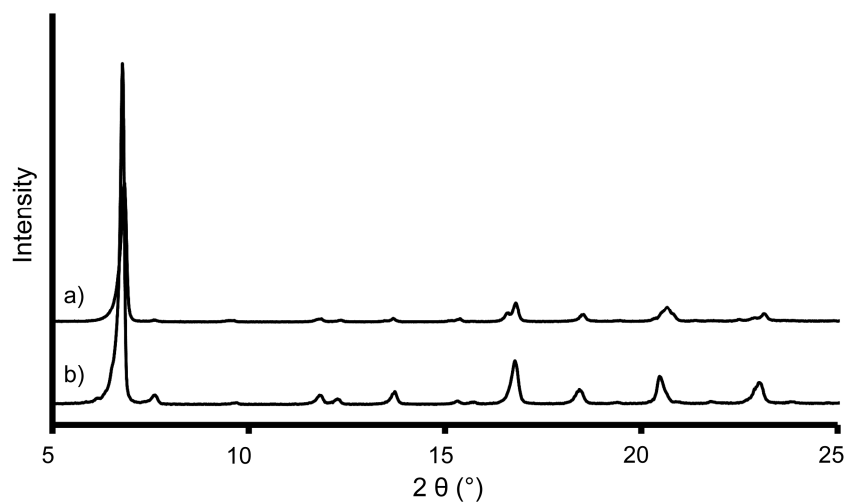

**Figure S1.** PXRD patterns of the inclusion crystals of compound **1** with PentOH (a) and HexOH (b) obtained by crystallization.

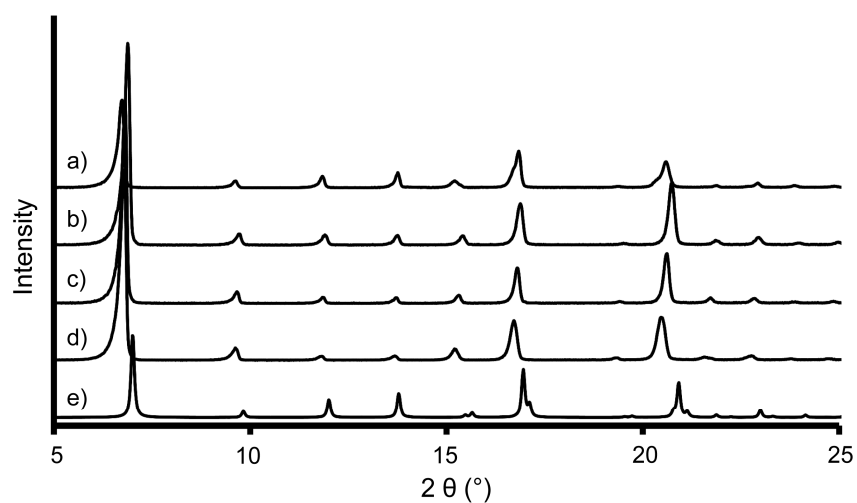

**Figure S2.** PXRD patterns of the inclusion crystals of compound **1** with MeOH (a), EtOH (b), PrOH (c) and BuOH (d) obtained by the suspension method, and a simulation from XRD data of **1**·EtOH measured at 100 K (e).

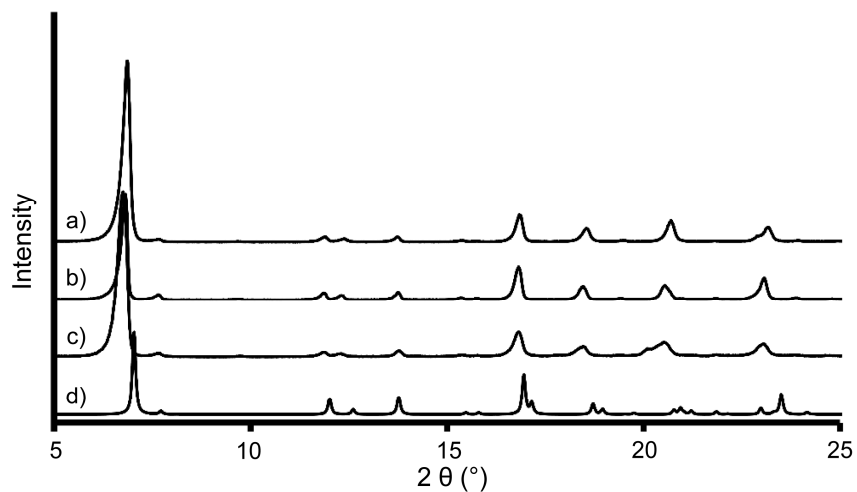

**Figure S3.** PXRD patterns of the inclusion crystals of compound **1** with PentOH (a), HexOH (b) and HeptOH (c) obtained by the suspension method, and a simulation from XRD data of  $1_2 \cdot \text{PentOH}$  measured at 100 K (d).

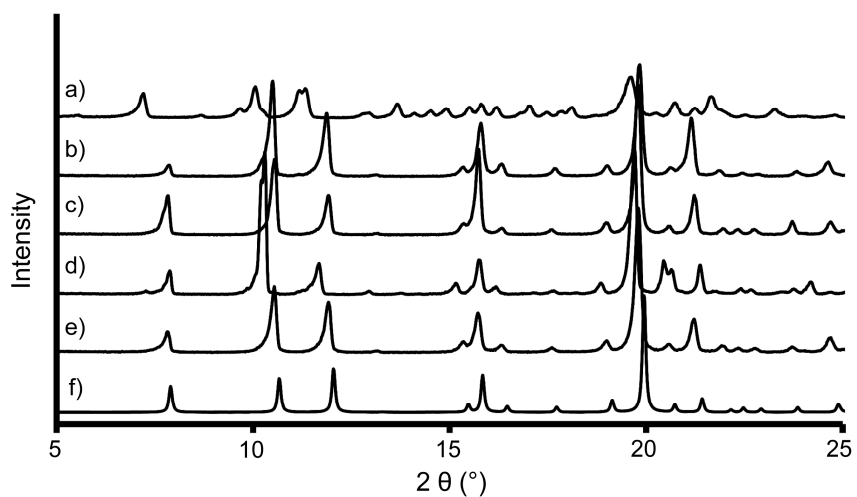

**Figure S4.** PXRD patterns of a crystalline powder of compound **2** (a) and its inclusion crystals with MeOH (b), EtOH (c) and PrOH (d) obtained by crystallization and with EtOH obtained by the suspension method (e), and a simulation from XRD data of  $2 \cdot \text{EtOH}$  measured at 223 K (f).

## II. Single crystal X-ray diffraction (XRD) studies for inclusion crystals of compound 1

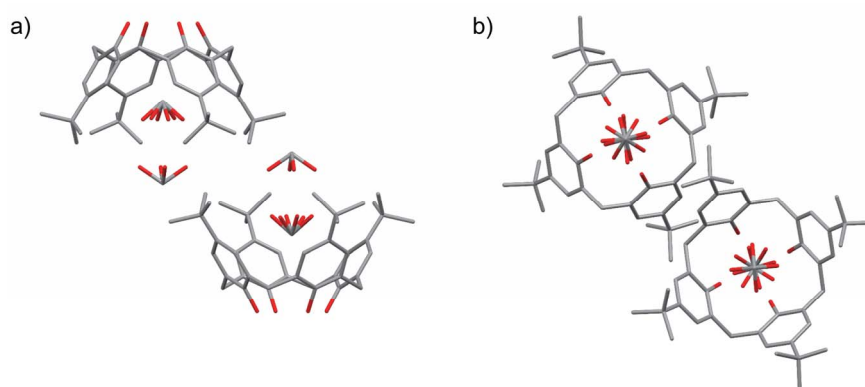

**Figure S5.** X-ray structure of 1·MeOH: Side view (a) and top view (b). Hydrogen atoms are omitted for clarity.

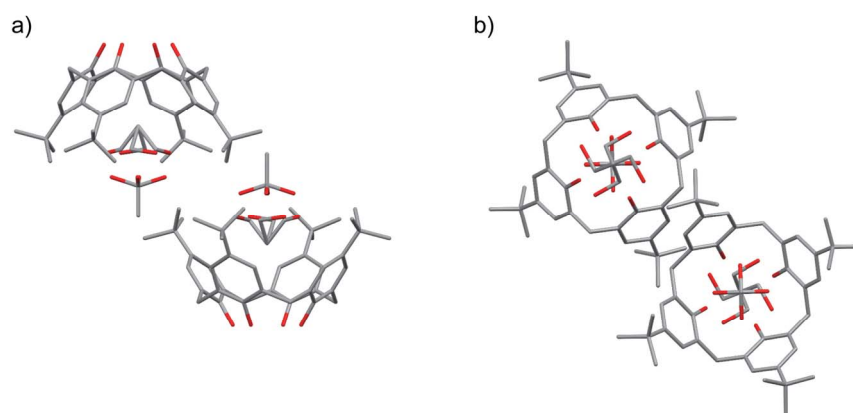

**Figure S6.** X-ray structure of 1·EtOH: Side view (a) and top view (b). Hydrogen atoms are omitted for clarity.

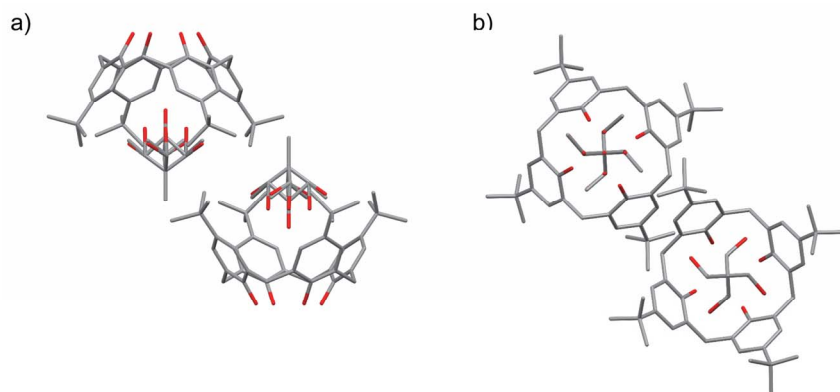

**Figure S7.** X-ray structure of **1·PrOH**: Side view (a) and top view (b). Hydrogen atoms are omitted for clarity.

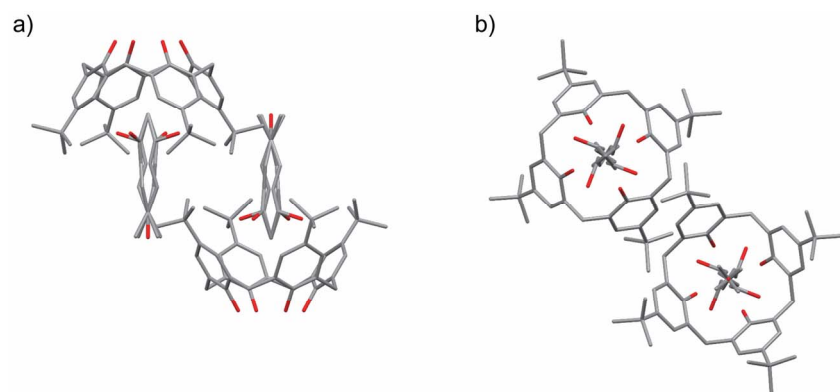

**Figure S8.** X-ray structure of **1·PentOH**: Side view (a) and top view (b). Hydrogen atoms are omitted for clarity.

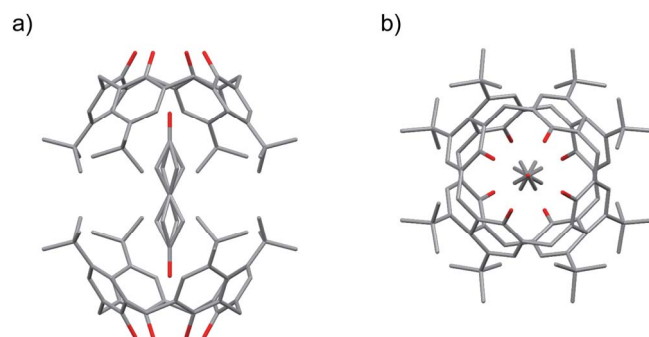

**Figure S9.** X-ray structure of **12-PentOH**: Side view (a) and top view (b). Hydrogen atoms are omitted for clarity.

### III. Single crystal X-ray diffraction (XRD) studies for inclusion crystals of compound 2

The structures of inclusion crystals **2**·MeOH, **2**·EtOH and **2**·PrOH reported in a preliminary communication<sup>1</sup> were reanalyzed under the restraint of disordered *tert*-butyl groups and guest molecules. Crystallographic data have been deposited with Cambridge Crystallographic Data Centre: Deposition number CCDC 1050720–1050722.

**Data for 2·MeOH.** C<sub>41</sub>H<sub>52</sub>O<sub>5</sub>S<sub>4</sub>, fw = 753.07, tetragonal, *P4/nmm*,  $a = 15.7827(7)$  Å,  $b = 15.7827(7)$  Å,  $c = 8.2365(7)$  Å,  $V = 2051.7(2)$  Å<sup>3</sup>,  $Z = 2$ ,  $T = 223(2)$  K, 11188 reflections measured, 1332 independent reflections, 1190 reflections were observed ( $I > 2\sigma(I)$ ),  $R_1 = 0.0955$ ,  $wR_2 = 0.2366$  (observed),  $R_1 = 0.1011$ ,  $wR_2 = 0.2559$  (all data).

**Data for 2·EtOH.** C<sub>42</sub>H<sub>54</sub>O<sub>5</sub>S<sub>4</sub>, fw = 767.09, tetragonal, *P4/nmm*,  $a = 15.8115(11)$  Å,  $b = 15.8115(11)$  Å,  $c = 8.2875(12)$  Å,  $V = 2071.9(4)$  Å<sup>3</sup>,  $Z = 2$ ,  $T = 223(2)$  K, 11205 reflections measured, 1341 independent reflections, 1107 reflections were observed ( $I > 2\sigma(I)$ ),  $R_1 = 0.0864$ ,  $wR_2 = 0.2301$  (observed),  $R_1 = 0.0962$ ,  $wR_2 = 0.2557$  (all data).

**Data for 2·PrOH.** C<sub>43</sub>H<sub>56</sub>O<sub>5</sub>S<sub>4</sub>, fw = 781.12, tetragonal, *P4/nmm*,  $a = 15.7986(9)$  Å,  $b = 15.7986(9)$  Å,  $c = 8.5474(10)$  Å,  $V = 2133.4(3)$  Å<sup>3</sup>,  $Z = 2$ ,  $T = 223(2)$  K, 11373 reflections measured, 1378 independent reflections, 1174 reflections were observed ( $I > 2\sigma(I)$ ),  $R_1 = 0.0980$ ,  $wR_2 = 0.2420$  (observed),  $R_1 = 0.1063$ ,  $wR_2 = 0.2630$  (all data).

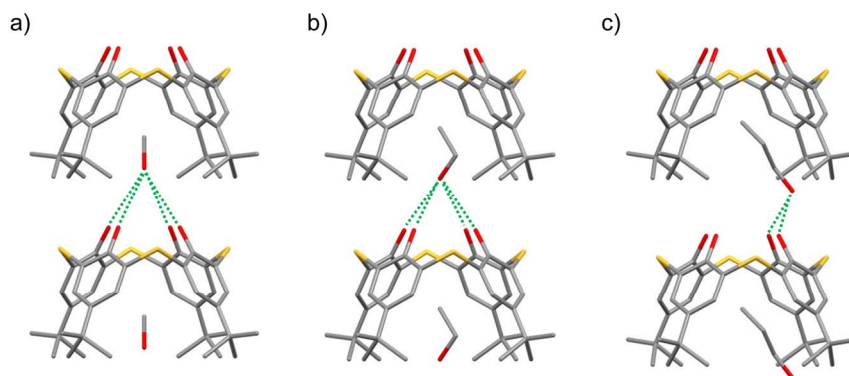

**Figure S10.** X-ray structures of **2·MeOH** (a), **2·EtOH** (b) and **2·PrOH** (c), showing partial packing structures along the *c*-axis. Hydrogen atoms and disordered atoms are omitted for clarity. Green dotted lines represent intermolecular hydrogen bonds; the O···O distances are 3.480 Å (a), 3.122 Å (b) and 2.688 Å (c), respectively. A CH- $\pi$  interaction is observed between the terminal methyl group of an alcohol molecule and the benzene rings of the host molecule including the alcohol molecule in its cavity; the C···Ar distances are 3.842 Å (a), 3.685 Å (b) and 3.651 Å (c), respectively.



#### IV. Reference

- [1] N. Morohashi, S. Noji, H. Nakayama, Y. Kudo, S. Tanaka, C. Kabuto and T. Hattori, *Org. Lett.*, 2011, **13**, 3292.
